# Supplementary material for: Effects of Oil Droplet Size and Interfacial Protein Film on the Properties of Fish Myofibrillar Protein–Oil Composite Gels
Source: PubMed Central journal article supplement (PMC7024232; doi:10.3390/molecules25020289), 2020-01-10
Supplement: molecules-25-00289-s001.pdf [file molecules-25-00289-s001.pdf]

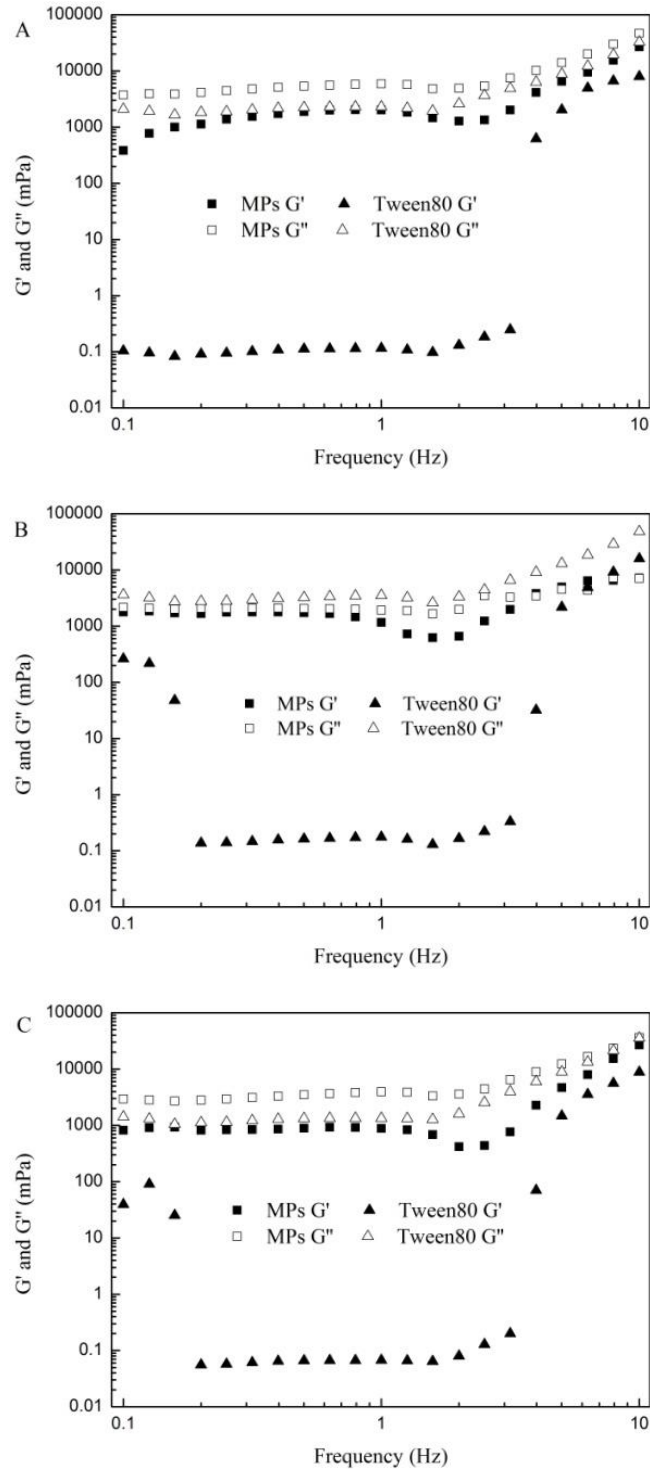

**Figure S1.** Storage modulus ( $G'$ ) and loss modulus ( $G''$ ) of MP- or Tween 80-stabilized camellia seed oil emulsions across different frequencies at 25 °C. A, homogenized at a speed of 5000 rpm; B, homogenized at a speed of 10000 rpm; C, homogenized at a speed of 15000 rpm

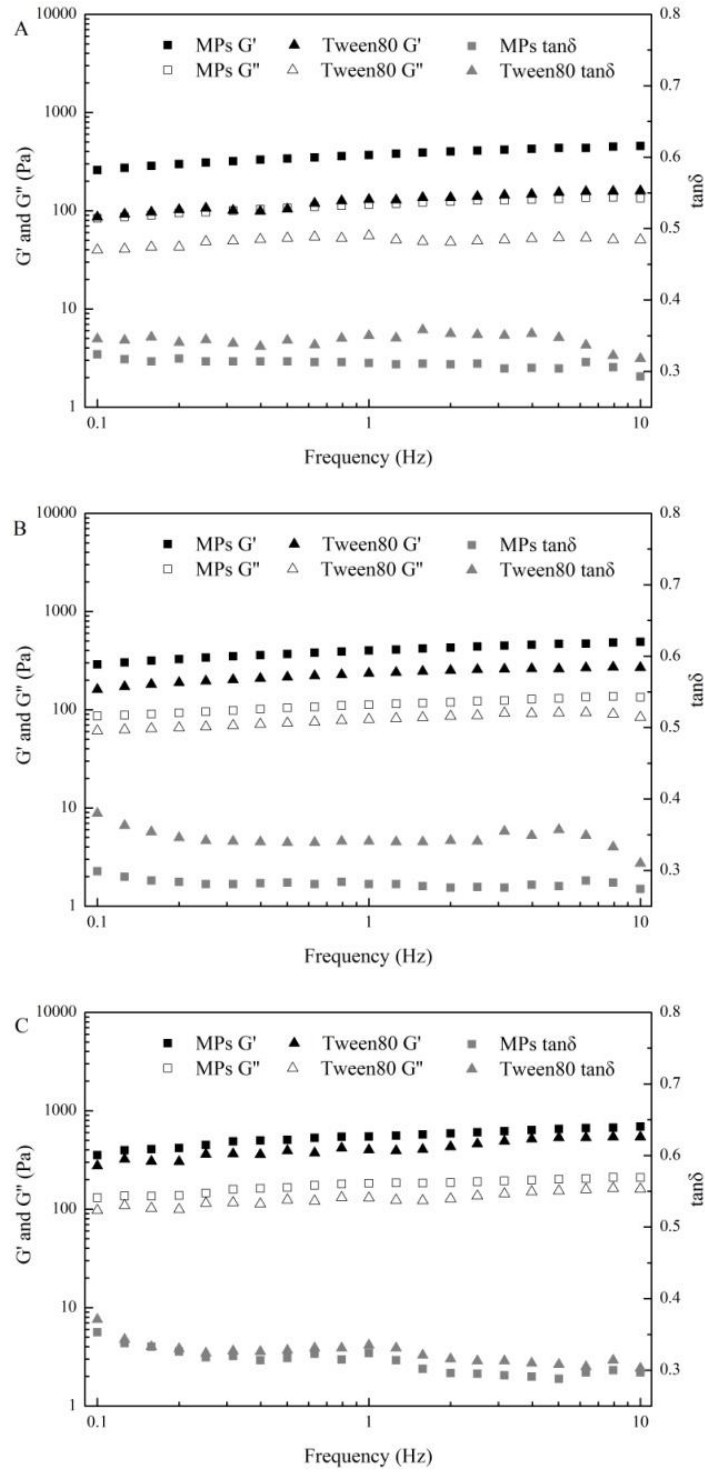

**Figure S2.** Storage modulus ( $G'$ ), loss modulus ( $G''$ ) and  $\tan \delta$  of gels containing MP- or Tween 80-stabilized camellia seed oil emulsions across different frequencies. A, homogenized at a speed of 5000 rpm; B, homogenized at a speed of 10000 rpm; C, homogenized at a speed of 15000 rpm.
